# Supplementary material for: Improved charge injection of edge aligned MoS2/MoO2 hybrid nanosheets for highly robust and efficient electrocatalysis of H2 production
Source: Royal Society of Chemistry journal article supplement (doi:10.1039/c9nr10578f), 2020-01-01
Supplement: c9nr10578f2.pdf [file c9nr10578f2.pdf]

## Supporting Information

### **Improve Charge Injection of the Edge Aligned MoS<sub>2</sub>/MoO<sub>2</sub> Hybrid Nanosheets for Highly Robust and Efficient Electrocatalysis of H<sub>2</sub> Production**

Shuaishuai Li,<sup>a</sup> Li Zhao,<sup>a</sup> Shulai Lei,<sup>b</sup> Aiping Liu,<sup>\*,a</sup> Jun Chen,<sup>c</sup> Chaorong Li,<sup>a</sup> Huaping Wu,<sup>d</sup> and Liangxu Lin<sup>\*,c,e</sup>

<sup>a</sup>Center for Optoelectronics Materials and Devices, Key Laboratory of Optical Field Manipulation of Zhejiang Province, Zhejiang Sci-Tech University, Hangzhou 310018, China

<sup>b</sup>Hubei Key Laboratory of Low Dimensional Optoelectronic Materials and Devices, Hubei University of Arts and Science, Xiangyang, 441053 Hubei, China

<sup>c</sup>ARC Centre of Excellence for Electromaterials Science, Intelligent Polymer Research Institute, Australia Institute for Innovative Materials (AIIM), Innovation Campus, University of Wollongong, Wollongong 2522, Australia

<sup>d</sup>Key Laboratory of E&M (Zhejiang University of Technology), Ministry of Education & Zhejiang Province, Hangzhou 310014, China

<sup>e</sup>The State Key Laboratory of Refractories and Metallurgy, and the Institute of Advanced Materials and Nanotechnology, Wuhan University of Science and Technology, Wuhan 430081, China

#### **Table of content:**

Figure S1-Figure S12, Table S1

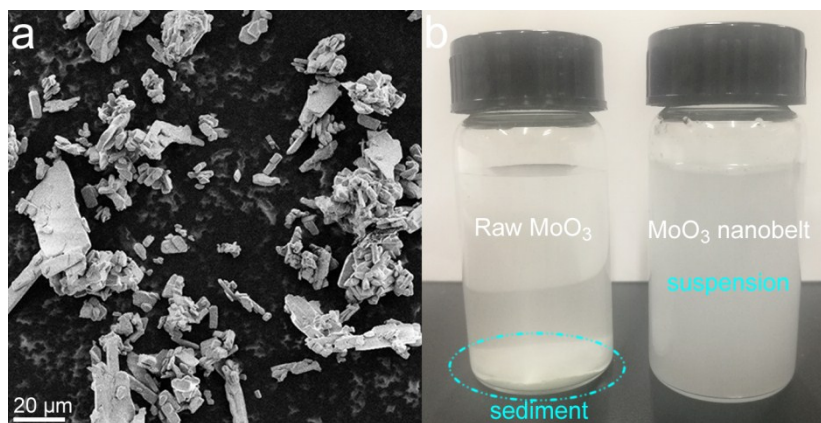

**Fig. S1** (a) SEM image of the raw  $\text{MoO}_3$  material; (b) Photographs of the suspension of the raw  $\text{MoO}_3$  material and  $\text{MoO}_3$  nanobelts. The raw  $\text{MoO}_3$  material cannot be dispersed well in the aqueous solution, *i.e.* sediment formed with seconds. By contrast, the  $\text{MoO}_3$  nanobelt can be dispersed well and stable (no visible sediment formed in half hour) in the aqueous solution, likely owing to the small size.

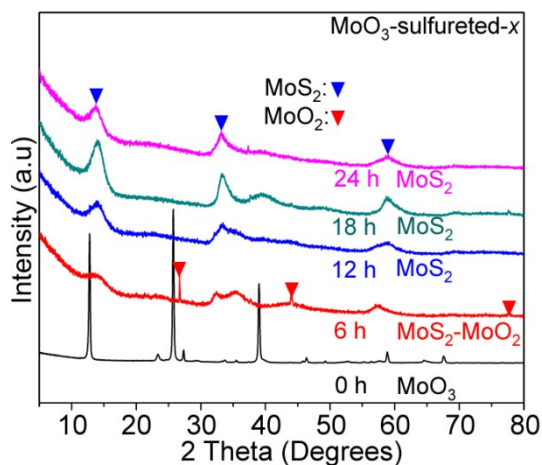

**Fig. S2** XRD patterns of the  $\text{MoO}_3$  nanobelts (orthorhombic  $\alpha$ - $\text{MoO}_3$ , ICDD card: 05-0508) and  $\text{MoO}_3$ -sulfured- $x$  samples ( $x = 6, 12, 18, 24$  h). Diffraction peaks at  $13.9^\circ$ ,  $33.4^\circ$ , and  $58.9^\circ$  are attributed from the (002), (100) and (110) crystal planes of 2H- $\text{MoS}_2$  (ICDD card: 87-2416). Diffraction peaks at around  $26.7^\circ$ ,  $44.1^\circ$ , and  $77.7^\circ$  can be ascribed to the metallic monoclinic  $\text{MoO}_2$  phase (ICDD card: 32-0671).

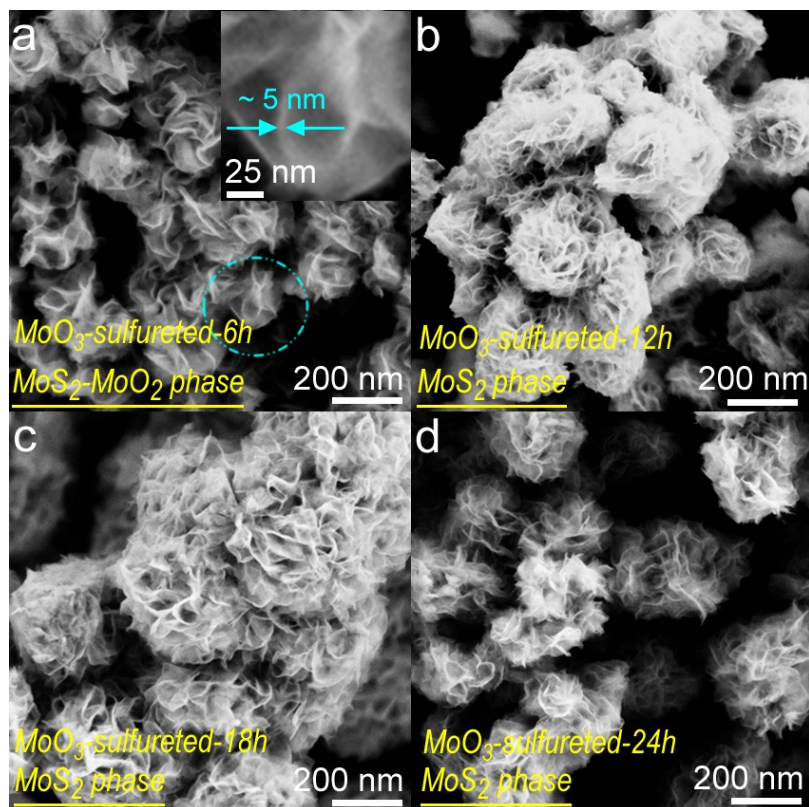

**Fig. S3** SEM images of MoO<sub>3</sub>-sulfured-6h (MoS<sub>2</sub>-MoO<sub>2</sub> composite) (a), MoO<sub>3</sub>-sulfured-12h (pure MoS<sub>2</sub>) (b) MoO<sub>3</sub>-sulfured-18h (pure MoS<sub>2</sub>) (c) and MoO<sub>3</sub>-sulfured-24h (pure MoS<sub>2</sub>) (d). Inset in figure a is the magnified local area (as labeled).

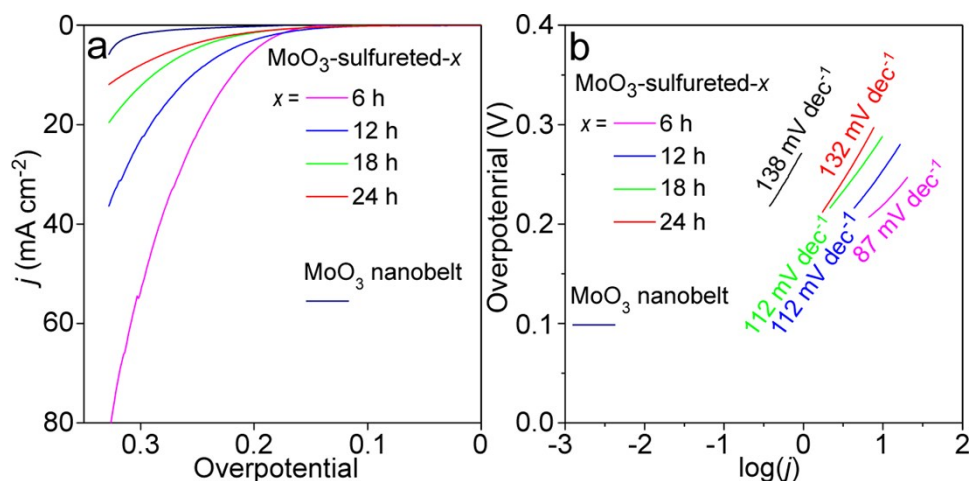

**Fig. S4** LSV (a) and Tafel (b) of MoO<sub>3</sub>-sulfured-*x* (*x* = 6, 12, 18, 24 h) and MoO<sub>3</sub> nanobelt. The MoO<sub>3</sub>-sulfured-6h exhibited the best catalytic performance among these investigated samples.

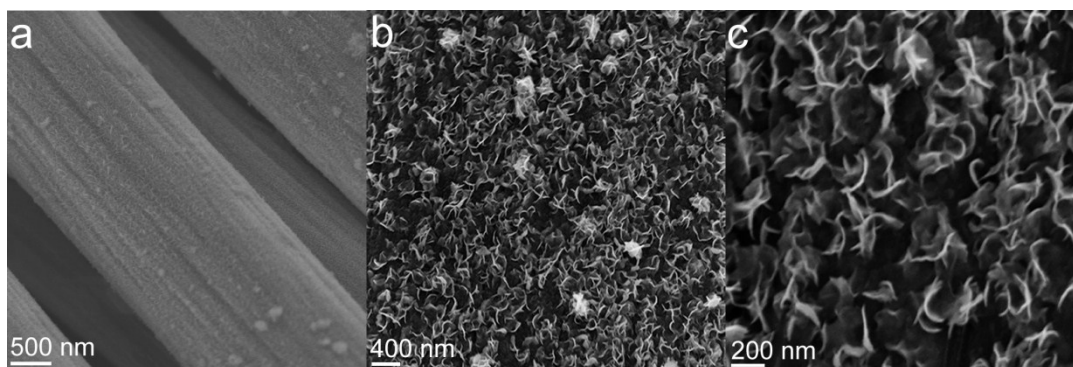

**Fig. S5** SEM images of  $\text{MoS}_2@\text{MoO}_2/\text{CC}-6\text{h}$ .

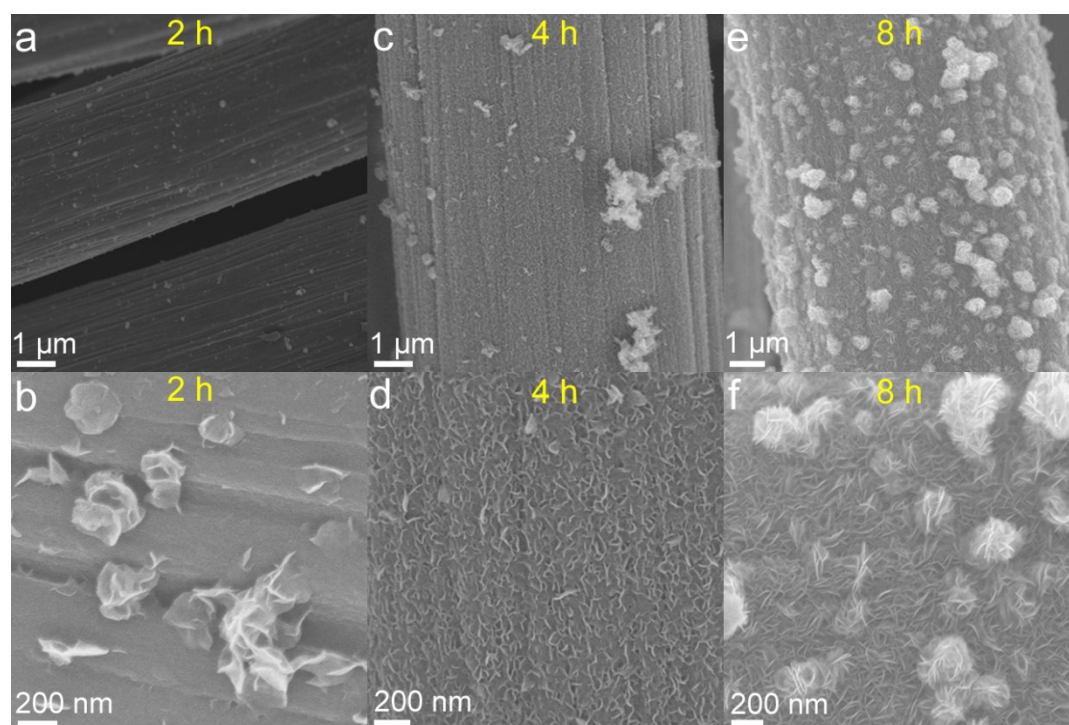

**Fig. S6** SEM images of  $\text{MoS}_2@\text{MoO}_2/\text{CC}-x$  obtained with different reaction time. a-b) 2h. c-d) 4h. e-f) 8h. In  $\text{MoS}_2@\text{MoO}_2/\text{CC}-2\text{h}$ , the particle on the surface are really few. Figure b shows some particles found occasionally.

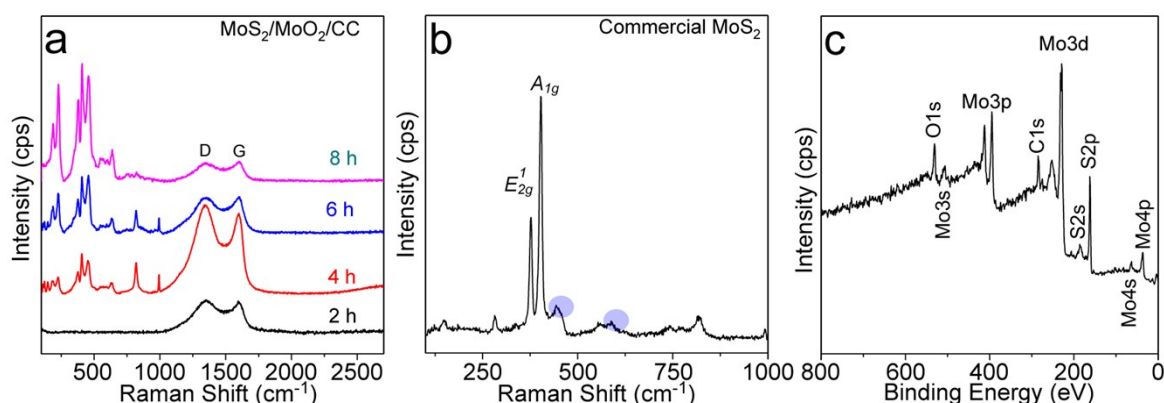

**Fig. S7** (a) Raman spectra of  $\text{MoS}_2@\text{MoO}_2/\text{CC}-2\text{h}$ ,  $\text{MoS}_2@\text{MoO}_2/\text{CC}-4\text{h}$ ,  $\text{MoS}_2@\text{MoO}_2/\text{CC}-6\text{h}$  and  $\text{MoS}_2@\text{MoO}_2/\text{CC}-8\text{h}$ ; (b) Raman spectrum of the commercial  $\text{MoS}_2$  flakes (Sigma-Aldrich, product No: 234842). The highlighted peaks are around 457 and 590  $\text{cm}^{-1}$  which were also found in our prepared samples; (c) XPS full survey of the  $\text{MoS}_2@\text{MoO}_2/\text{CC}-6\text{h}$ .



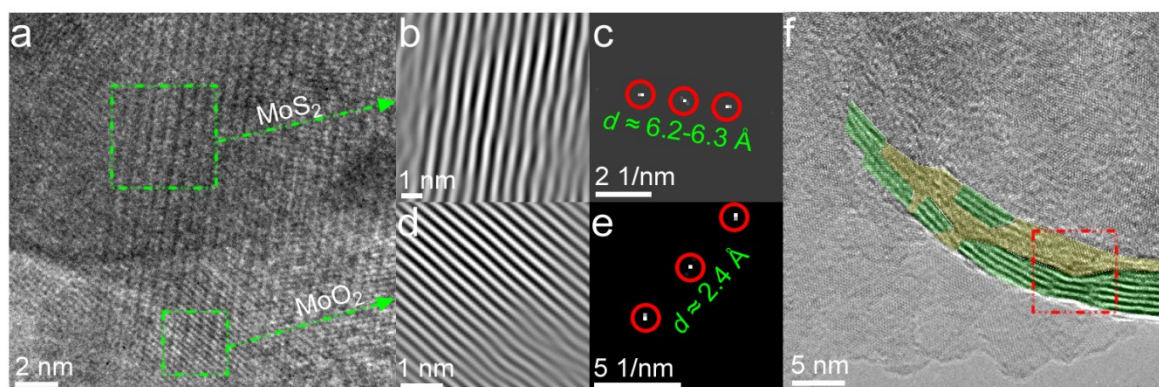

**Fig. S8** (a-f) HRTEM image of one sheet show both the 2H-MoS<sub>2</sub> and monoclinic MoO<sub>2</sub> crystal domains (a), which are highlighted as the corresponding simulated HRTEM images (b, d) and FFT patterns (c, e); f) One edge composed by the MoO<sub>2</sub> and MoS<sub>2</sub>, with selected area magnified in Fig. 3l.

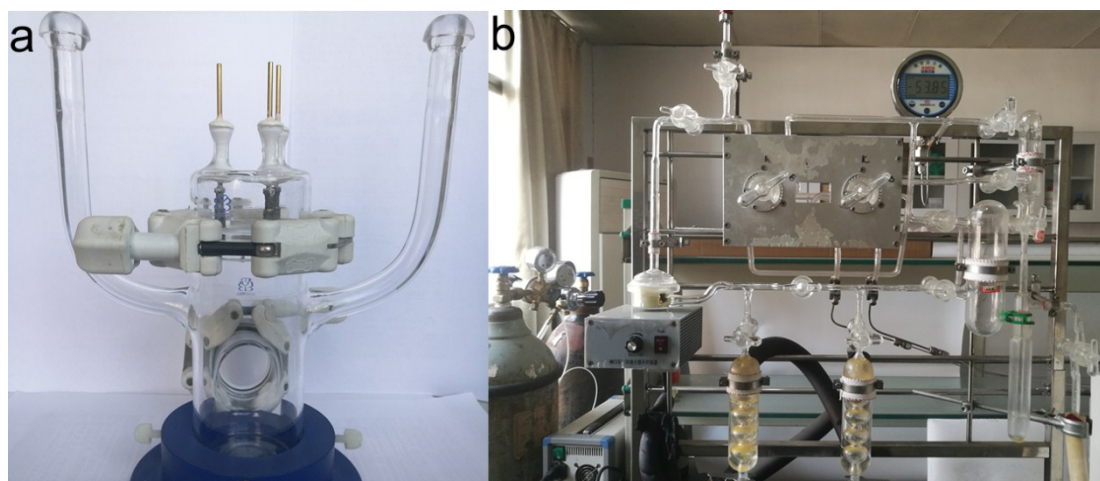

**Fig. S9** (a) the photograph of the sealable three-electrode cell for the evaluation of the Faradaic efficiency. In this case, the reference electrode of the Ag/AgCl with saturated KCl was used; (b) The photograph of the full set up used for the estimation of the Faradaic efficiency.

**Table S1** Theoretical H<sub>2</sub> production *versus* experimental measured H<sub>2</sub> amount, and Faradaic efficiencies at different period for MoS<sub>2</sub>@MoO<sub>2</sub>-CC-6h (constant  $j$  of 30 mA cm<sup>-2</sup>, 1.0 × 1.0 cm<sup>2</sup> electrode).

| Time (min)          | 20     | 40     | 60     | 80     | 100    | 120    |
|---------------------|--------|--------|--------|--------|--------|--------|
| Calculated (mmol)   | 0.1866 | 0.3732 | 0.5598 | 0.7464 | 0.933  | 1.116  |
| Measured (mmol)     | 0.1824 | 0.3671 | 0.5516 | 0.7396 | 0.9294 | 1.1105 |
| Faradaic efficiency | 97.7%  | 98.3%  | 98.5%  | 99.1%  | 99.6%  | 99.2%  |
| Average             | 98.7%  |        |        |        |        |        |

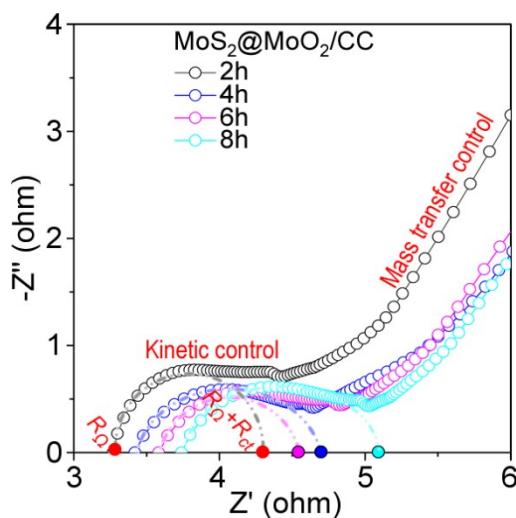

**Fig. S10** EIS Nyquist plots of various catalysts modified electrodes in a 0.5 M  $\text{H}_2\text{SO}_4$  solution at  $5 \text{ mV s}^{-1}$ . The ( $R_\Omega$ ,  $R_\Omega + R_{ct}$ ) of  $\text{MoS}_2@\text{MoO}_2/\text{CC}$ -2h,  $\text{MoS}_2@\text{MoO}_2/\text{CC}$ -4h,  $\text{MoS}_2@\text{MoO}_2/\text{CC}$ -6h,  $\text{MoS}_2@\text{MoO}_2/\text{CC}$ -8h are ( $3.27 \Omega$ ,  $4.30 \Omega$ ), ( $3.42 \Omega$ ,  $4.69 \Omega$ ), ( $3.58 \Omega$ ,  $4.54 \Omega$ ) and ( $3.74 \Omega$ ,  $5.10 \Omega$ ), respectively.

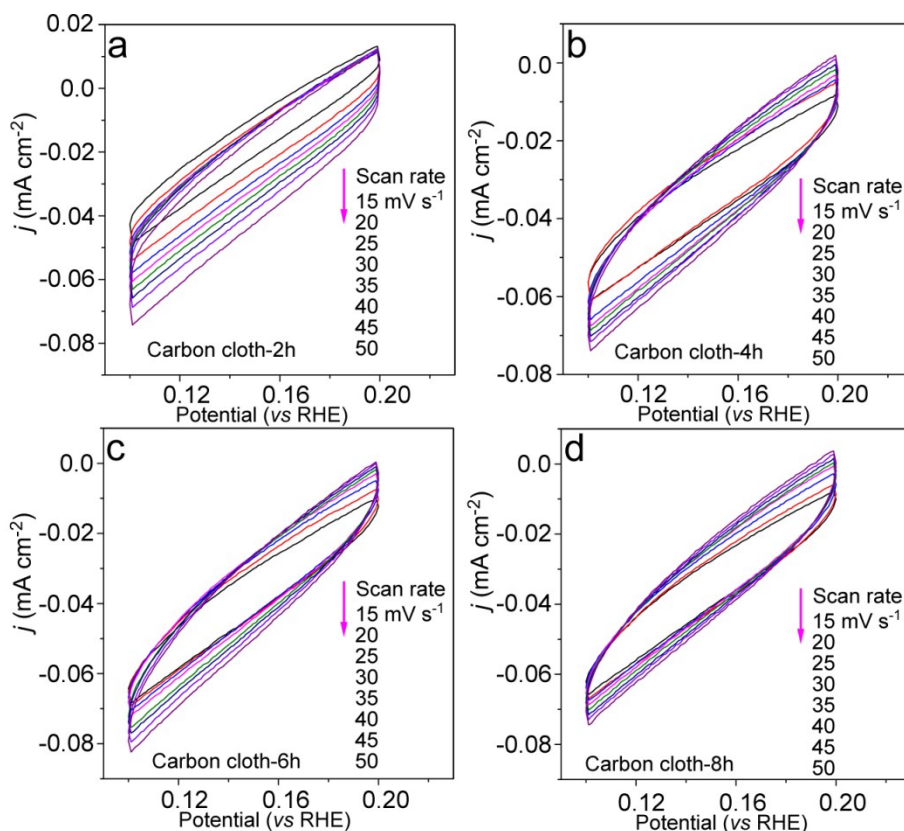

**Fig. S11** CV curves of carbon cloth after solvothermal reactions with different reaction time: (a) carbon cloth-2h; (b) carbon cloth-4h; (c) carbon cloth-6h; (d) carbon cloth-8h. The  $C_{dl}$  calculated at the potential of 0.15 V of these four samples are nearly identical.

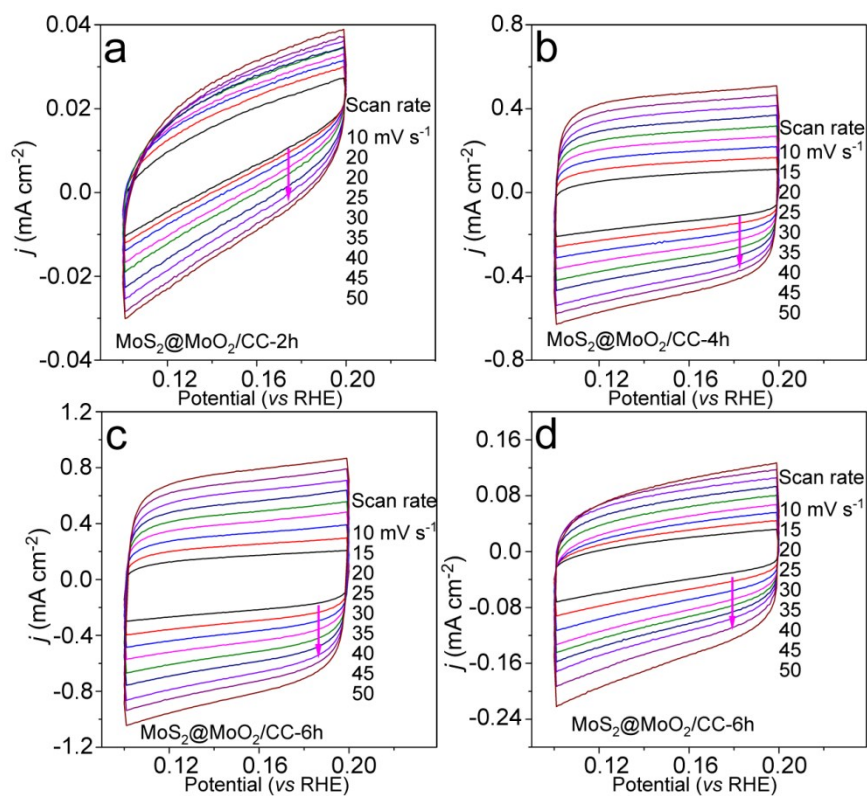

**Fig. S12** CV curves of different samples: (a)  $\text{MoS}_2@\text{MoO}_2/\text{CC-2h}$ ; (b)  $\text{MoS}_2@\text{MoO}_2/\text{CC-4h}$ ; (c)  $\text{MoS}_2@\text{MoO}_2/\text{CC-6h}$ ; (d)  $\text{MoS}_2@\text{MoO}_2/\text{CC-8h}$ .
